# Supplementary material for: Glucose-6-phosphate 1-Epimerase CrGlu6 Contributes to Development and Biocontrol Efficiency in Clonostachys chloroleuca
Source: MDPI journal article supplement (doi:10.3390/jof9070764), 2023-07-20
Supplement: s1 [file s1]

## SUPPLEMENTARY DATA:

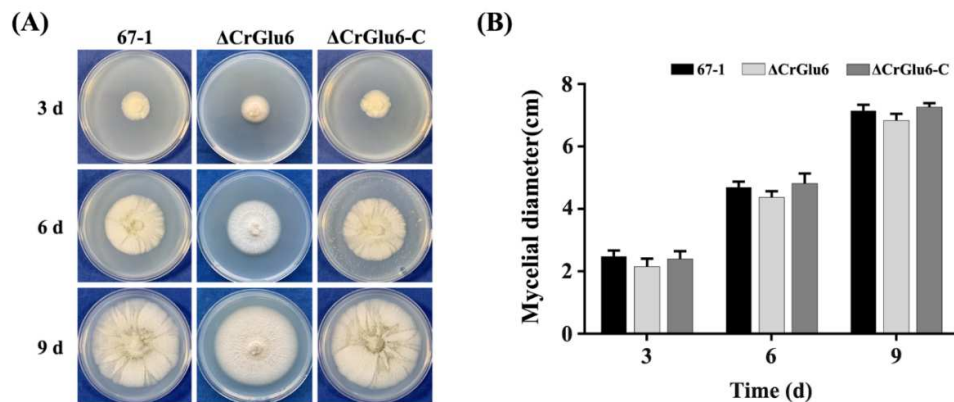

**Figure S1.** Impact of *CrGlu6* deficiency on mycelial growth. Mycelial growth of 67-1,  $\Delta$ *CrGlu6*, and  $\Delta$ *CrGlu6-C* on PDA medium after 3, 6, and 9 days of incubation. The data are the means of three mutants, and the means and standard errors are calculated from three independent repeats. Statistical tests were performed by Tukey test for multiple comparisons.

**Table S1** Primers used in this study

| Primer      | Sequence (5'–3')                             | Relevant characteristics                                                                        |
|-------------|----------------------------------------------|-------------------------------------------------------------------------------------------------|
| CrGlu6-UF   | GGTCTTAAU<br>TGCAGGTCGTCATGATCACT            | Amplification of the <i>CrGlu6</i> 5' region for construction of <i>CrGlu6</i> deletion mutants |
| CrGlu6-UR   | GGCATTAAU<br>ACAAGTCCCTTTTCCTGCCA            |                                                                                                 |
| CrGlu6-DF   | GGACTTAAU<br>GGGTGGGTTAGGGAGATTGT            |                                                                                                 |
| CrGlu6-DR   | GGGTTTAAU<br>CACCCTCATCACCCGCTAC             | Amplification of the <i>CrGlu6</i> 3' region for construction of <i>CrGlu6</i> deletion mutants |
| Hph-F       | TGGAGCTAGTGGAGGTCAACA                        | Amplification of the hygromycin resistant gene <i>hph</i>                                       |
| Hph-R       | CGGTCGGCATCTACTCTATTC                        |                                                                                                 |
| CrGlu6-In-F | TACCAATCCGCATCGCATTG                         | Identification of <i>CrGlu6</i> deletion transformants                                          |
| CrGlu6-In-R | ATTCAATGCGACCAGAGAGC                         |                                                                                                 |
| CrGlu6-Yz-F | CTCATGCTGTTCGGTTCCAT                         | Identification of <i>CrGlu6</i> deletion transformants                                          |
| CrGlu6-Yz-R | AGAACTCCTCCGTGCCCCG                          |                                                                                                 |
| CrGlu6-COMF | CCCCCGGGCTGCAGGAATTCAT<br>GCTGTTCCGGTTCATTGG | <i>CrGlu6</i> complementation                                                                   |

|             |                                                                            |                                                                                |
|-------------|----------------------------------------------------------------------------|--------------------------------------------------------------------------------|
| CrGlu6-COMR | TCGACGGTATCGATAAGCTTCTT<br>GAGTTGGCGTTCTTGGT                               |                                                                                |
| CrGlu6-F    | GCTCGTCTTCCCGGTTTTTC                                                       | Identification of <i>CrGlu6</i> expression levels in qRT-PCR and RT-PCR assays |
| CrGlu6-R    | CTCAAAGGAAGTCTCGCCGT                                                       |                                                                                |
| EF1-F       | TCGATGTCGCTCCTGACT                                                         | Amplification of the reference gene <i>EF1</i> in qRT-PCR and RT-PCR assays    |
| EF1-R       | AGCGTGACCGTTTATTGTA                                                        |                                                                                |
| Crmapk-BD-F | CATGGAGGCCGAATTCATGTCT<br>CGATCAACTCAGCCCAGC                               | Construction of pGBKT7-Crmapk for Y2H assay                                    |
| Crmapk-BD-R | GCAGGTCGACGGATCCTCATCG<br>CATGACCTCCTGGTAGAT                               |                                                                                |
| CrGlu6-AD-F | GGAGGCCAGTGAATTCATGGCC<br>ACTCTCGCCTCTTGGACG                               | Construction of pGADT7-CrGlu6 for Y2H assay                                    |
| CrGlu6-AD-R | CGAGCTCGATGGATCCCTAGGG<br>GAGGGAGATGGTCTGGGC<br>CAGATCTTGGCTTTCGTAGGAA     |                                                                                |
| Crmapk-65-F | CCCAATCTTCAATGTCTCGATCA<br>ACTCAGCC                                        | Construction of YFP <sup>N</sup> -Crmapk for BiFC assay                        |
| Crmapk-65-R | GCTCACCATCGTGGCGATGGAG<br>CGTCGCATGACCTCCTGGTAGA<br>CAGATCTTGGCTTTCGTAGGAA |                                                                                |
| CrGlu6-68-F | CCCAATCTTCAATGGCCACTCTC<br>GCCTCTTG                                        | Construction of CrGlu6-YFP <sup>C</sup> for BiFC assay                         |
| CrGlu6-68-R | GTTCGGGATCTTGCAGGCCGGG<br>CGGGGGAGGGAGATGGTCTGG<br>GC                      |                                                                                |

---
